# Supplementary material for: Chemistry of aromatic polythioesters and polydithioesters
Source: Royal Society of Chemistry journal article supplement (doi:10.1039/c4py01702a), 2015-01-01
Supplement: c4py01702a1.pdf [file c4py01702a1.pdf]

## Supplementary Information

### **Chemistry of aromatic polythioesters and polydithioesters**

**Daisuke Abe, Yuichiro Fukuda and Yuji Sasanuma\***

*Department of Applied Chemistry and Biotechnology, Graduate School  
and Faculty of Engineering, Chiba University, 1-33 Yayoi-cho, Inage-ku,  
Chiba 263-8522, Japan*

\*Corresponding author

E-mail: [sasanuma@faculty.chiba-u.jp](mailto:sasanuma@faculty.chiba-u.jp); Tel and Fax: +81 43 290 3394.

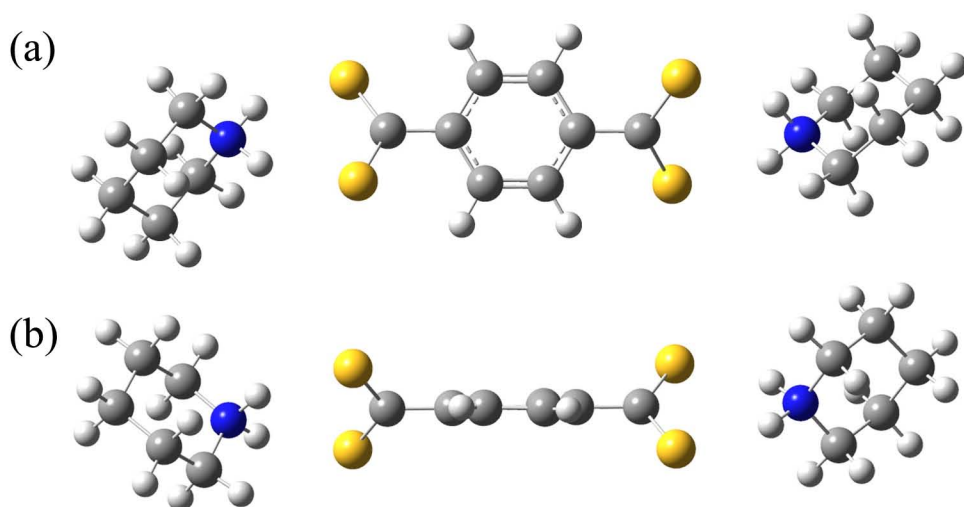

**Fig. S1** The optimized structure of the  $S_4$  TPA-Pip complex:  
 (a) top and (b) side views with respect to the benzene ring.  
 The H-N-H and S-C-S triangles lie in a plane, the N-H and C-S lengths and the N-H...S-C distance are, respectively, 1.04, 1.71, and 2.32 Å, the N-N-H and S-C-S angles are, respectively, 100.1 and 125.1°, and the two S-C-S triangles make an angle of 78°.

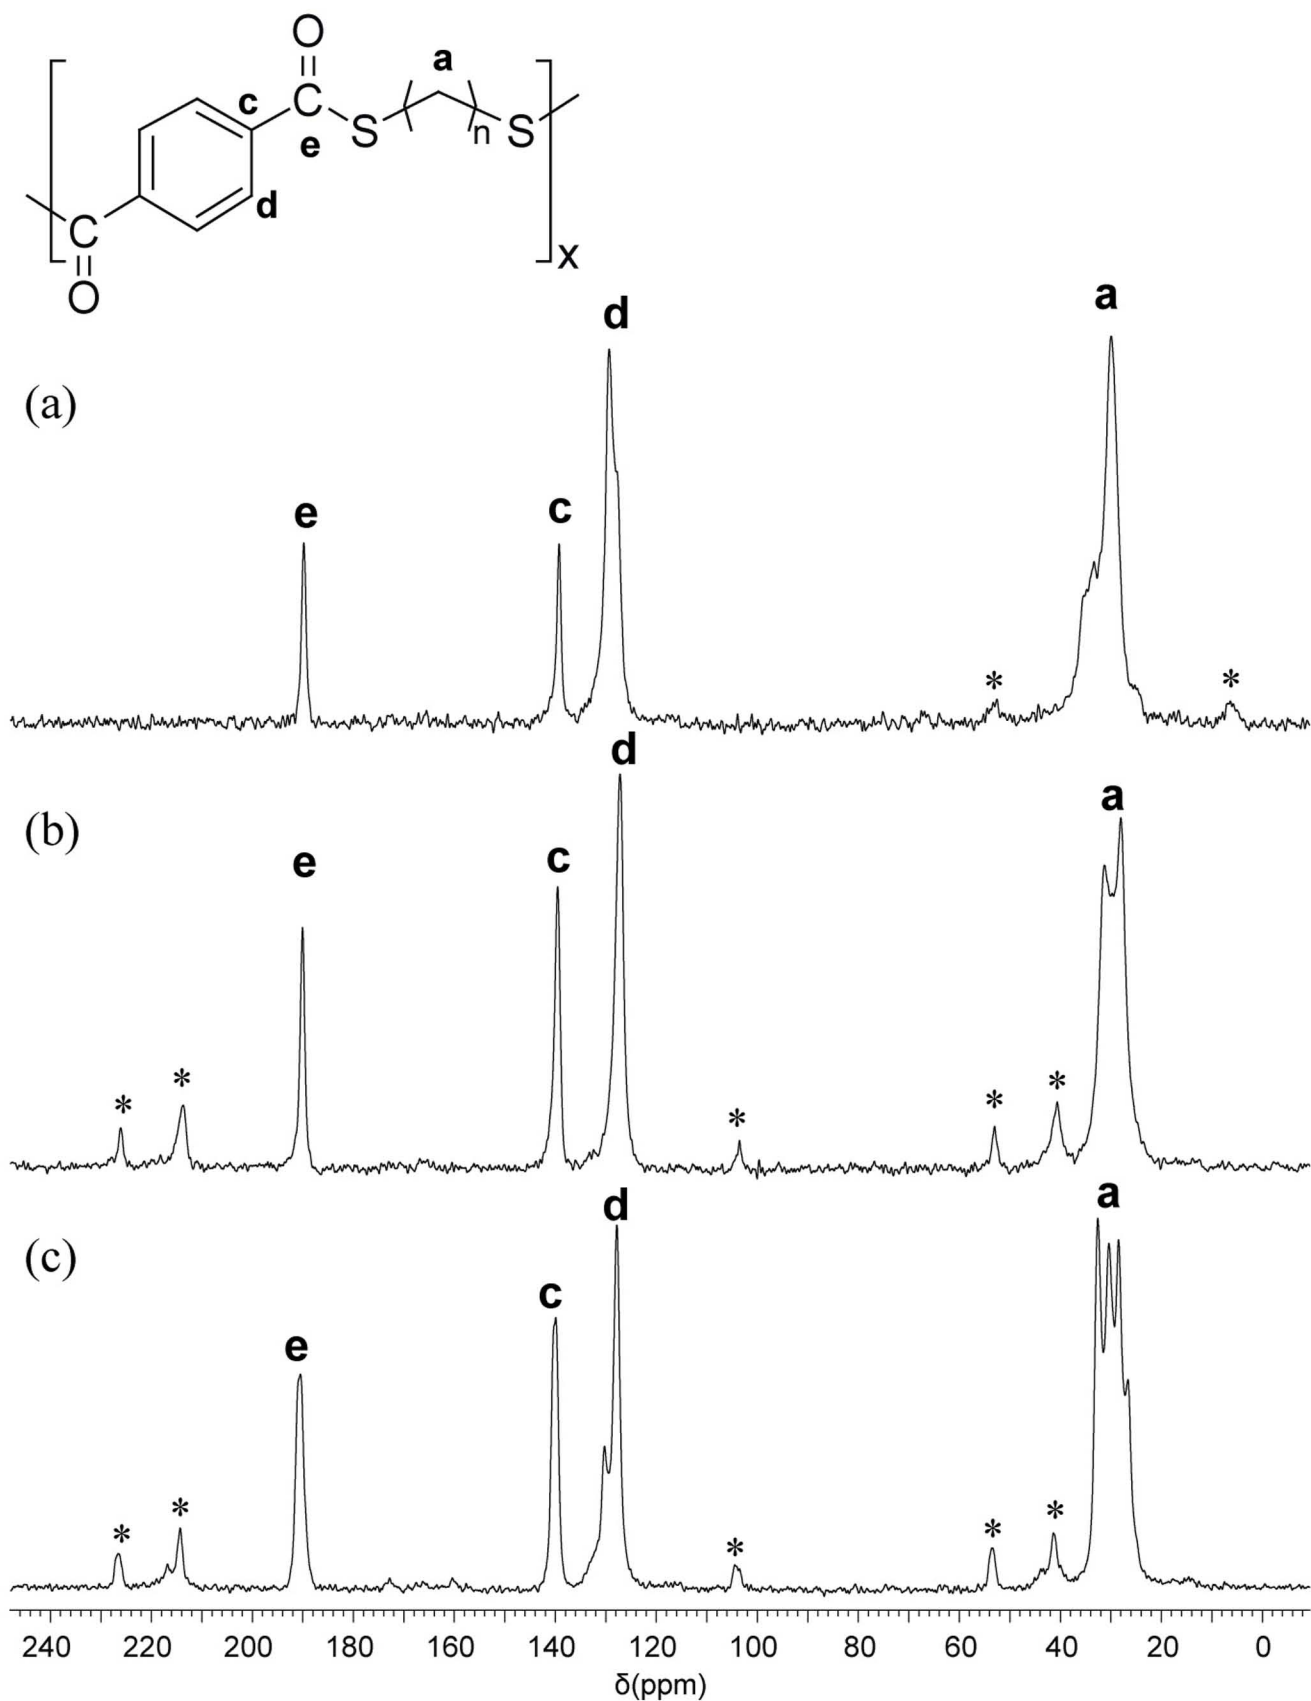

**Fig. S2** Solid state  $^{13}\text{C}$  CP/MAS NMR spectra: (a) P3TS<sub>2</sub> ; (b) P4TS<sub>2</sub> ; (c) P5TS<sub>2</sub> . The peaks were assigned as indicated. The asterisks represent spinning side bands.

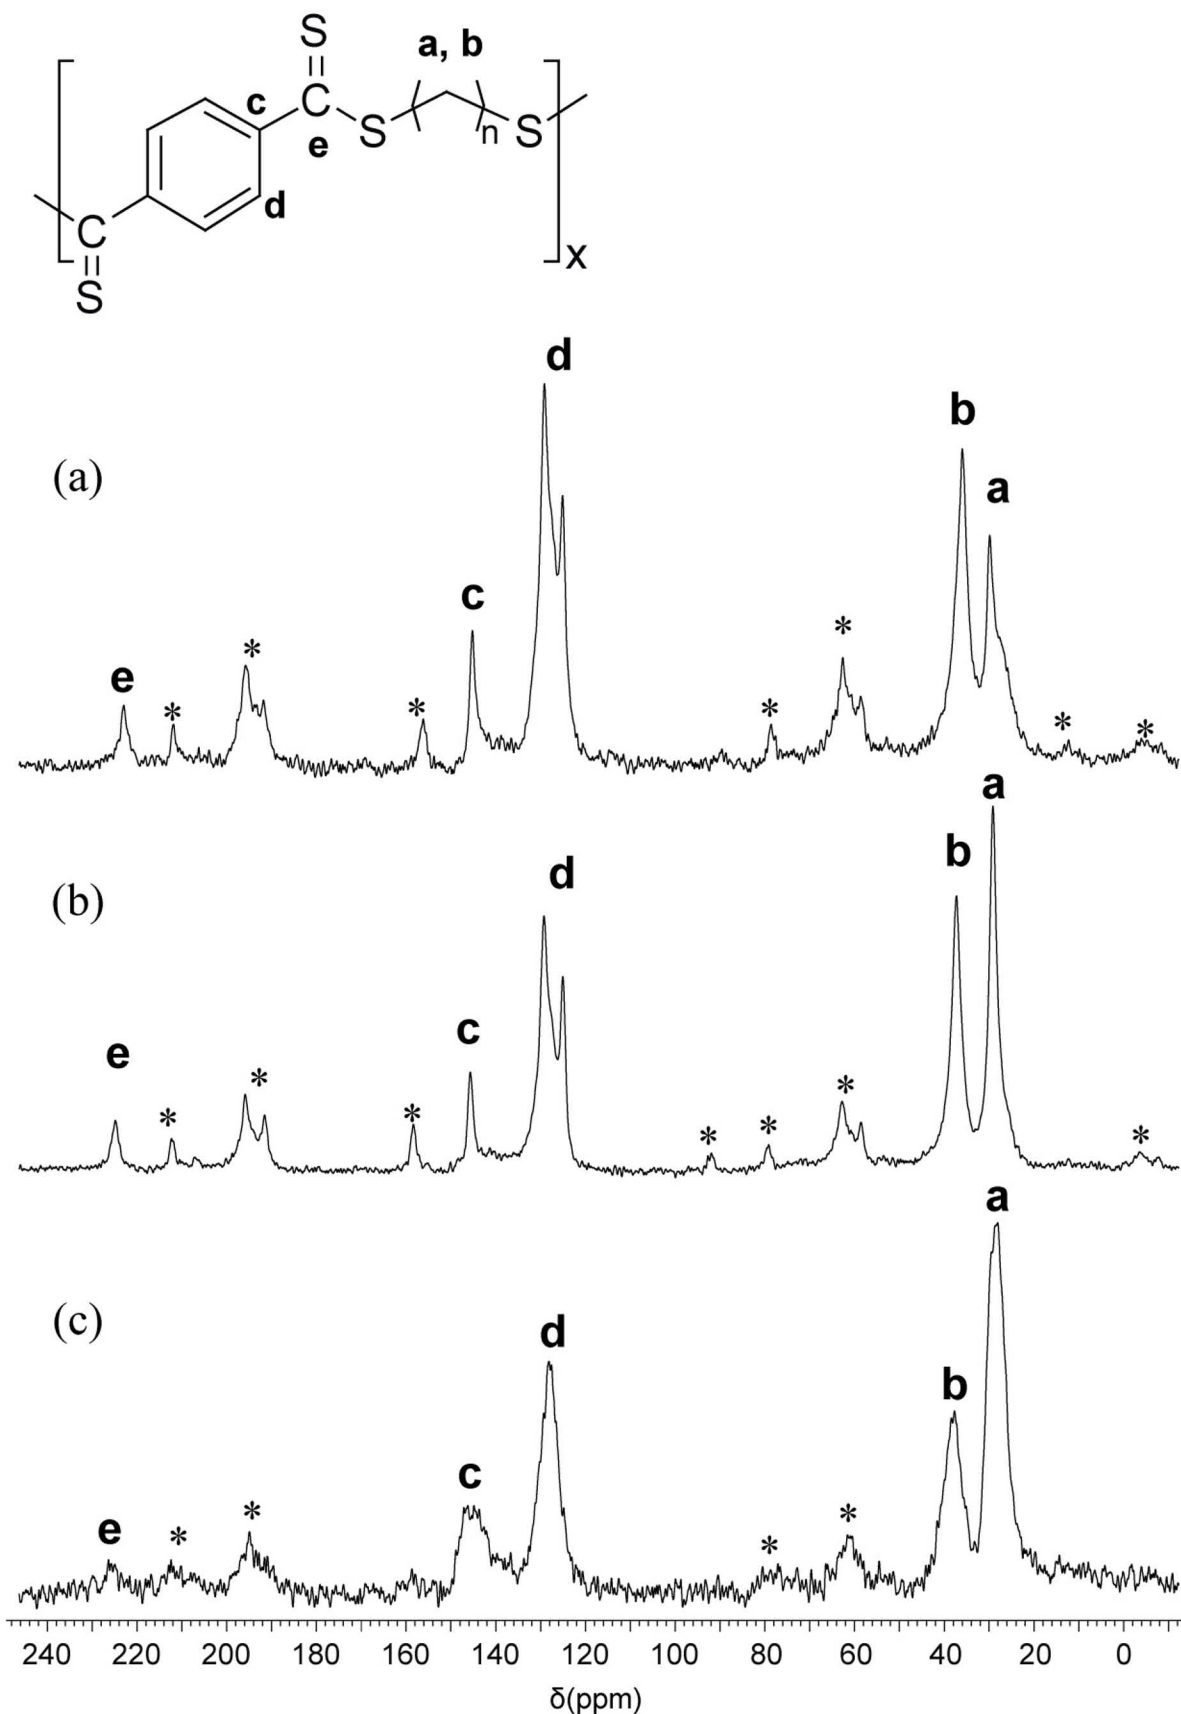

**Fig. S3** Solid state  $^{13}\text{C}$  CP/MAS NMR spectra: (a) P3TS<sub>4</sub> ; (b) P4TS<sub>4</sub> ; (c) P5TS<sub>4</sub> . The peaks were assigned as indicated. The asterisks represent spinning side bands.

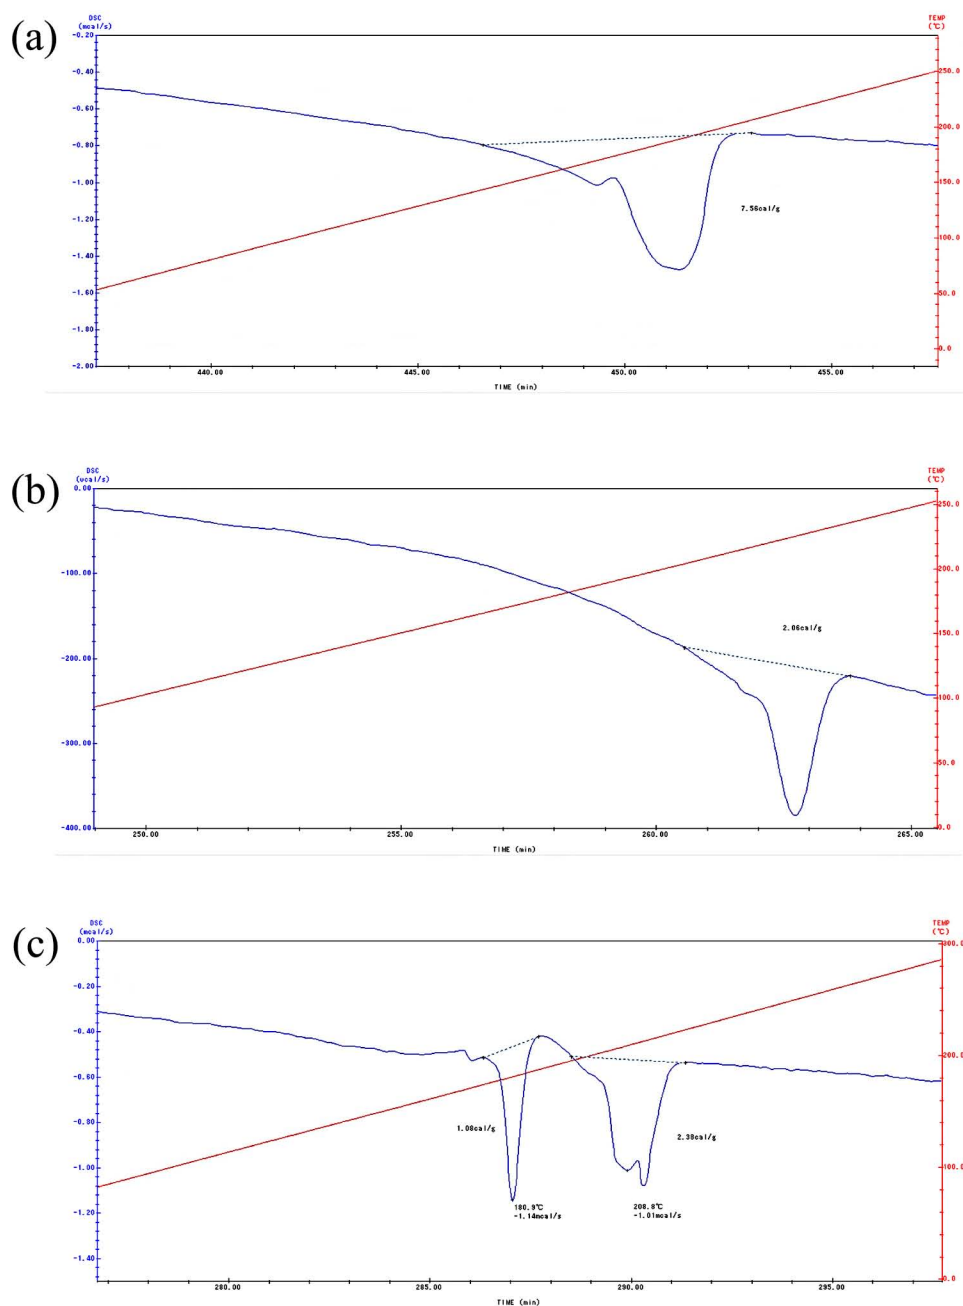

**Fig. S4** DSC charts of P<sub>y</sub>TS<sub>2</sub>: (a) P3TS<sub>2</sub>; (b) P4TS<sub>2</sub>; (c) P5TS<sub>2</sub>.

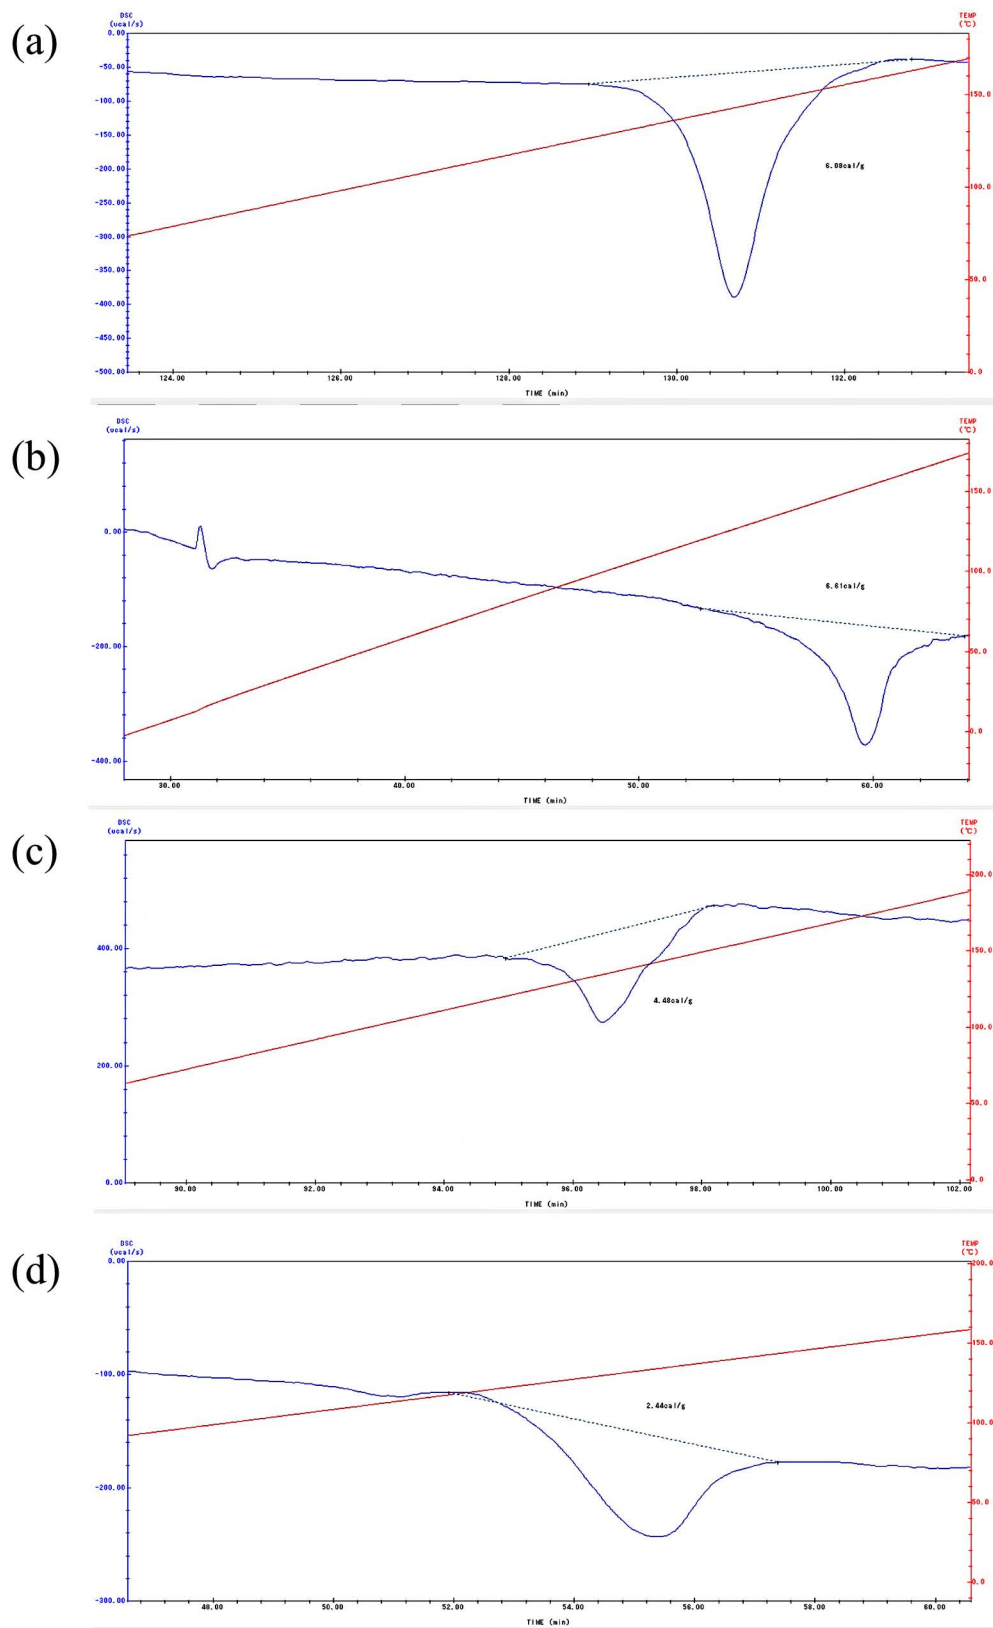

**Fig. S5** DSC charts of PyTS<sub>4</sub>: (a) P3TS<sub>4</sub> (DMF); (b) P3TS<sub>4</sub> (DMSO); (c) P4TS<sub>4</sub> (DMF); (d) P4TS<sub>4</sub> (DMSO). The polymerization solvent is written in the parenthesis.

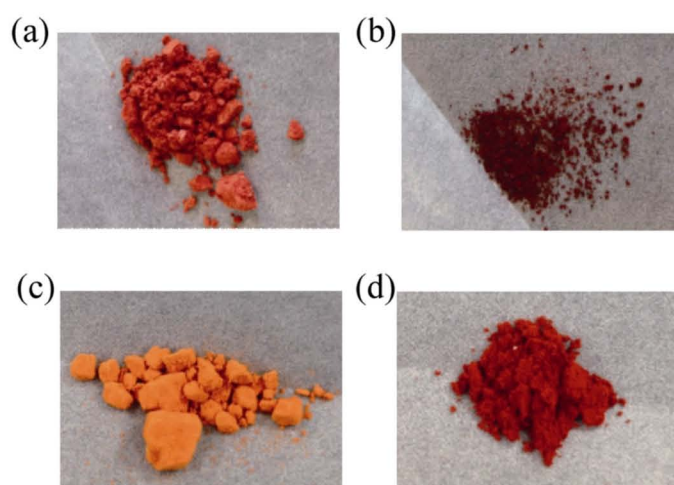

**Fig. S6** P3TS<sub>4</sub> and P4TS<sub>4</sub> : (a) as-precipitated P3TS<sub>4</sub> ; (b) annealed P3TS<sub>4</sub> ; (c) as-precipitated P4TS<sub>4</sub> ; (d) annealed P4TS<sub>4</sub> . The annealing was carried out at 150 °C for 2 h.
